# Supplementary material for: Skin-permissible NIR-actuated hyperthermia using a photothermally responsive hydrogel membrane for the effective treatment of antibiotic-resistant bacterial infection
Source: Royal Society of Chemistry journal article supplement (doi:10.1039/d1bm01819a), 2021-12-16
Supplement: d1bm01819a1.pdf [file d1bm01819a1.pdf]

## Supporting Information

### **Skin-permissible NIR-actuated hyperthermia by a photothermally responsive hydrogel membrane for the effective treatment of antibiotic-resistant bacterial infection**

Zhongpeng Yu, <sup>b,+</sup> Jie Sun, <sup>b,+</sup> Hongling Deng, <sup>b</sup> Hong Kan, <sup>a,c</sup> Chen Xu, <sup>a,b,c,\*</sup> Kai Dong <sup>a,c,\*</sup>

<sup>a</sup>College of Chinese Medicinal Materials, Jilin Agricultural University, Changchun 130118, PR China

<sup>b</sup>School of Chemical Engineering, Changchun University of Technology, Changchun Jilin 130012, PR China.

<sup>c</sup>National & Local Joint Engineering Research Center for Ginseng Breeding and Development, Changchun 130118, PR China.

Fax: +86 431 88915858; Tel: +86 431 88796996

Corresponding Author: \*Correspondence should be addressed to Kai Dong (dongkai@jlau.edu.cn) and Chen Xu (E-mail: xuchen@ccut.edu.cn).

<sup>+</sup> These authors contributed equally to this work.

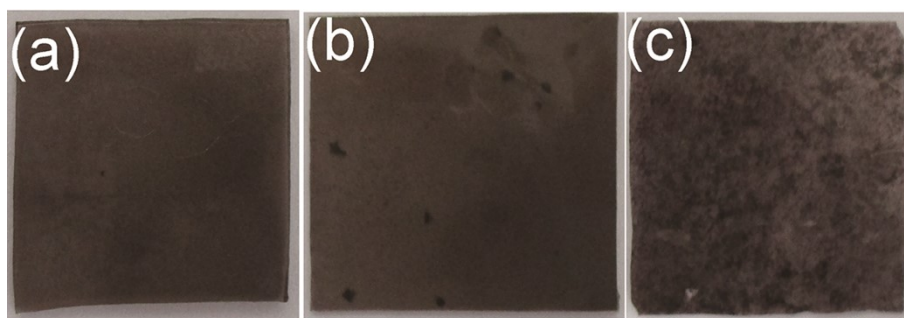

**Fig. S1** The photograph of STF with different concentrations of TA (a) 40%, (b) 60% and (c) 80%.

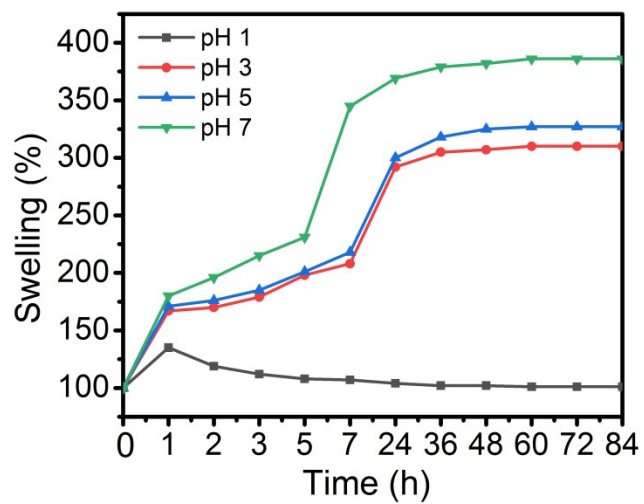

**Fig. S2** The swelling studies of STF in the solution with various pH values of 1, 3, 5, and 7.

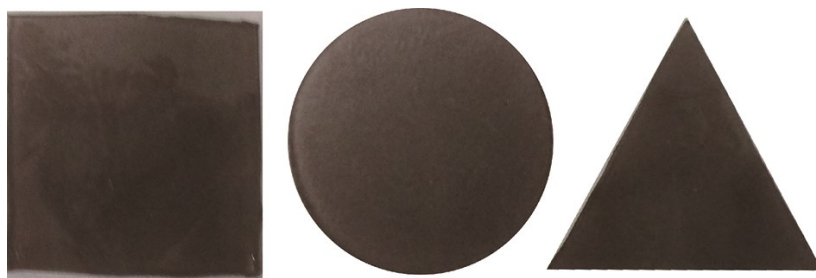

**Fig. S3** Photographs of STF with diverse shapes (square, circle, triangle).

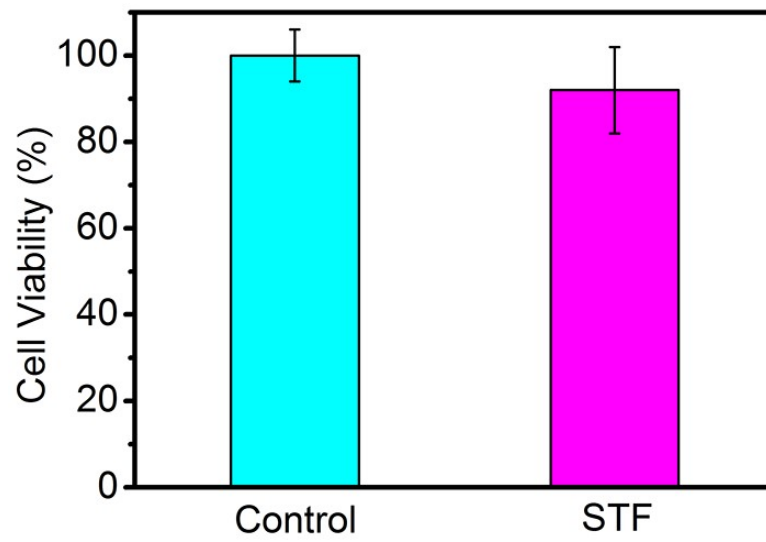

**Fig. S4** The MTT assay for evaluating the cytocompatibility of STF.
